# Supplementary material
Source: PubMed Central journal article supplement (PMC3131812)
Supplement: 1100306108_pnas.201100306SI.pdf [file 1100306108_pnas.201100306SI.pdf]

# Supporting Information

Strassmann 10.1073/pnas.1100306108

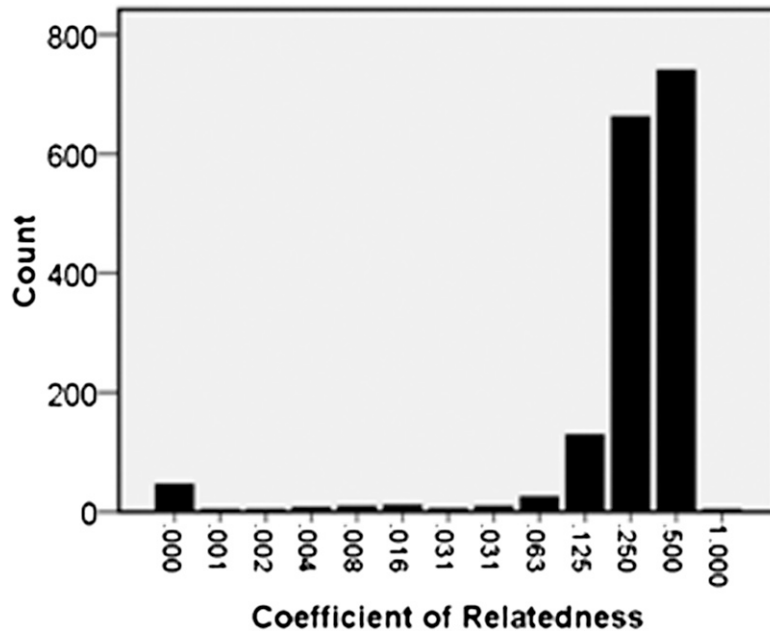

Fig. S1. The number of children by their coefficient of relatedness to their work-eat group (WEG) boss.

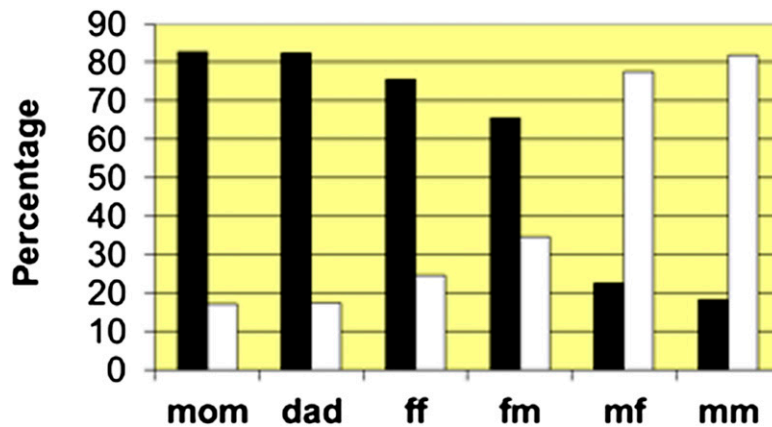

Fig. S2. The percentage of children who lived in the same village as each kind of relative (dead relatives were excluded from the analysis). Black bars represent the children that lived with the relative, and white bars represent the children that did not live with the relative. ff, father's father; fm, father's mother; mf, mother's father; mm, mother's mother.

**Table S1. Predictors of death by age 5 y (n = 3,000 person-y and n = 165 deaths)**

| Variable                               | P       | Hazard ratio | 95% confidence limits |
|----------------------------------------|---------|--------------|-----------------------|
| Mother*                                | 0.0113  | 0.242        | 0.081–0.726           |
| Father*                                | 0.6899  | 1.511        | 0.199–11.471          |
| Year 1 <sup>†</sup>                    | 0.0002  | 2.316        | 1.495–3.589           |
| Year 2 <sup>‡</sup>                    | <0.0001 | 2.500        | 1.644–3.802           |
| Male <sup>‡</sup>                      | 0.0595  | 0.740        | 0.541–1.012           |
| WEG boss                               |         |              |                       |
| Father's father <sup>§</sup>           | 0.9647  | 1.011        | 0.610–1.677           |
| Mother's father <sup>§</sup>           | 0.1425  | 0.535        | 0.232–1.234           |
| Father's brother <sup>§</sup>          | 0.5266  | 1.234        | 0.644–2.364           |
| Father's father's brother <sup>§</sup> | 0.1349  | 1.719        | 0.845–3.497           |
| Unrelated <sup>§</sup>                 | 0.4339  | 0.553        | 0.126–2.436           |
| Miscellaneous <sup>§</sup>             | 0.2434  | 0.646        | 0.309–1.347           |
| Grandparents                           |         |              |                       |
| Father's mother*                       | 0.0007  | 1.857        | 1.305–2.693           |
| Father's father*                       | 0.0485  | 1.556        | 1.003–2.415           |
| Mother's mother*                       | 0.7668  | 0.949        | 0.672–1.341           |
| Mother's father*                       | 0.6570  | 1.075        | 0.781–1.479           |
| Number of adults in WEG                | 0.5651  | 0.988        | 0.948–1.030           |

This model includes the number of adults in the WEG.

\*Reference is dead.

<sup>†</sup>Reference is year 3.

<sup>‡</sup>Reference is female.

<sup>§</sup>Reference is father.

**Table S2. Predictors of death by age 5 y (n = 2961 person-y and n = 163 deaths)**

| Variable                               | P       | Hazard ratio | 95% confidence limits |
|----------------------------------------|---------|--------------|-----------------------|
| Mother*                                | 0.0140  | 0.248        | 0.081–0.745           |
| Father*                                | 0.6965  | 1.495        | 0.198–11.258          |
| Mother's age                           | 0.2645  | 0.985        | 0.959–1.011           |
| Year 1 <sup>†</sup>                    | 0.0002  | 2.350        | 1.504–3.671           |
| Year 2 <sup>‡</sup>                    | <0.0001 | 2.573        | 1.684–3.932           |
| Male <sup>‡</sup>                      | 0.0558  | 0.734        | 0.535–1.008           |
| WEG boss                               |         |              |                       |
| Father's father <sup>§</sup>           | 0.6695  | 0.900        | 0.554–1.461           |
| Mother's father <sup>§</sup>           | 0.0783  | 0.460        | 0.194–1.092           |
| Father's brother <sup>§</sup>          | 0.7287  | 1.116        | 0.601–2.074           |
| Father's father's brother <sup>§</sup> | 0.2549  | 1.478        | 0.754–2.896           |
| Unrelated <sup>§</sup>                 | 0.3367  | 0.478        | 0.106–2.155           |
| Miscellaneous <sup>§</sup>             | 0.1680  | 0.594        | 0.284–1.245           |
| Grandparents                           |         |              |                       |
| Father's mother*                       | 0.0023  | 1.795        | 1.231–2.616           |
| Father's father*                       | 0.0691  | 1.510        | 0.968–2.356           |
| Mother's mother*                       | 0.5776  | 0.904        | 0.635–1.288           |
| Mother's father*                       | 0.6788  | 1.072        | 0.773–1.486           |
| Dependency ratio <sup>¶</sup>          | 0.9290  | 0.984        | 0.685–1.412           |

\*Reference is dead

<sup>†</sup>Reference is year 3.

<sup>‡</sup>Reference is female.

<sup>§</sup>Reference is father.

<sup>¶</sup>This model includes the dependency ratio, which is defined as the number of children age < 10 y divided by the number of married adults in the WEG.

**Table S3. Predictors of death by age 5 y (n = 2,933 person-y and n = 161 deaths)**

| Variable                                | P       | Hazard ratio | 95% confidence limits |
|-----------------------------------------|---------|--------------|-----------------------|
| Mother*                                 | 0.0095  | 0.230        | 0.076–0.698           |
| Father*                                 | 0.7219  | 1.442        | 0.192–10.843          |
| Mother's age                            | 0.3339  | 0.987        | 0.961–1.014           |
| Year 1 <sup>†</sup>                     | 0.0001  | 2.457        | 1.554–3.884           |
| Year 2 <sup>†</sup>                     | <0.0001 | 2.745        | 1.772–4.252           |
| Male <sup>‡</sup>                       | 0.0990  | 0.763        | 0.553–1.052           |
| Wealth                                  | 0.0409  | 1.140        | 1.005–1.293           |
| Polygyny                                | 0.0641  | 1.333        | 0.983–1.808           |
| Village 9 <sup>§</sup>                  | 0.0108  | 0.602        | 0.407–0.889           |
| WEG boss                                |         |              |                       |
| Father's father <sup>  </sup>           | 0.8654  | 1.044        | 0.636–1.714           |
| Mother's father <sup>  </sup>           | 0.0850  | 0.468        | 0.198–1.110           |
| Father's brother <sup>  </sup>          | 0.3258  | 1.391        | 0.720–2.684           |
| Father's father's brother <sup>  </sup> | 0.0439  | 1.956        | 1.019–3.756           |
| Unrelated <sup>  </sup>                 | 0.5411  | 0.619        | 0.133–2.880           |
| Miscellaneous <sup>  </sup>             | 0.3303  | 0.675        | 0.306–1.489           |
| Grandparents                            |         |              |                       |
| Father's mother*                        | 0.0009  | 1.921        | 1.307–2.823           |
| Father's father*                        | 0.0583  | 1.551        | 0.985–2.444           |
| Mother's mother*                        | 0.7120  | 0.935        | 0.655–1.335           |
| Mother's father*                        | 0.6272  | 1.085        | 0.780–1.509           |

This model omits the interaction of polygyny and village 9.

\*Reference is dead.

<sup>†</sup>Reference is year 3.

<sup>‡</sup>Reference is female.

<sup>§</sup>Reference is villages 1–8.

<sup>||</sup>Reference is father.

**Table S4. Predictors of death by age 5 y (n = 2,947 person-y and n = 161 deaths)**

| Variable                                | P       | Hazard ratio | 95% confidence limits |
|-----------------------------------------|---------|--------------|-----------------------|
| Mother*                                 | 0.0045  | 0.204        | 0.068–0.612           |
| Father*                                 | 0.7286  | 1.429        | 0.190–10.733          |
| Mother's age                            | 0.2599  | 0.985        | 0.958–1.012           |
| Year 1 <sup>†</sup>                     | <0.0001 | 2.464        | 1.566–3.877           |
| Year 2 <sup>†</sup>                     | <0.0001 | 2.692        | 1.743–4.160           |
| Male <sup>‡</sup>                       | 0.0986  | 0.763        | 0.554–1.052           |
| Wealth                                  | 0.0694  | 1.120        | 0.991–1.266           |
| Mother's marital status                 |         |              |                       |
| Fiancé <sup>§</sup>                     | 0.1914  | 0.502        | 0.179–1.411           |
| Polygynous <sup>§</sup>                 | 0.3282  | 1.228        | 0.873–1.726           |
| Village 9 <sup>  </sup>                 | 0.0115  | 0.607        | 0.412–0.894           |
| WEG Boss                                |         |              |                       |
| Father's father <sup>  </sup>           | 0.9776  | 0.993        | 0.608–1.622           |
| Mother's father <sup>  </sup>           | 0.3757  | 0.662        | 0.266–1.648           |
| Father's brother <sup>  </sup>          | 0.3858  | 1.338        | 0.693–2.586           |
| Father's father's brother <sup>  </sup> | 0.0505  | 1.922        | 0.999–3.701           |
| Unrelated <sup>  </sup>                 | 0.7313  | 0.768        | 0.171–3.456           |
| Miscellaneous <sup>  </sup>             | 0.4060  | 0.717        | 0.327–1.572           |
| Grandparents                            |         |              |                       |
| Father's mother*                        | 0.0013  | 1.870        | 1.278–2.736           |
| Father's father*                        | 0.0499  | 1.565        | 1.000–2.449           |
| Mother's mother*                        | 0.7181  | 0.937        | 0.659–1.333           |
| Mother's father*                        | 0.6420  | 1.081        | 0.778–1.503           |

Instead of a variable for WEG polygyny, this table includes variables for the mother's marital status: fiancé and polygynous in reference to monogamous mothers.

\*Reference is dead.

<sup>†</sup>Reference is year 3.

<sup>‡</sup>Reference is female.

<sup>§</sup>Reference is monogamous.

<sup>||</sup>Reference is villages 1–8.

<sup>||</sup>Reference is father.

**Table S5. Predictors of death by age 5 y (n = 2,762 person-y and n = 155 deaths)**

| Variable                           | P       | Hazard ratio | 95% confidence limits |
|------------------------------------|---------|--------------|-----------------------|
| Mother*                            | 0.0050  | 0.206        | 0.068–0.620           |
| Father*                            | 0.6597  | 1.546        | 0.222–10.755          |
| Father's age                       | 0.0696  | —            | —                     |
| Father's age × father's mother     | 0.0116  | —            | —                     |
| Year 1 <sup>†</sup>                | 0.0007  | 2.214        | 1.395–3.513           |
| Year 2 <sup>‡</sup>                | <0.0001 | 2.484        | 1.603–3.851           |
| Male <sup>‡</sup>                  | 0.1535  | 0.786        | 0.565–1.094           |
| Wealth                             | 0.0616  | 1.128        | 0.964–1.281           |
| WEG polygyny <sup>§</sup>          | 0.0510  | —            | —                     |
| Village 9 <sup>  </sup>            | 0.4676  | —            | —                     |
| Polygyny × village 9 <sup>  </sup> | 0.0934  | —            | —                     |
| WEG boss                           |         |              |                       |
| Father's father**                  | 0.6160  | 1.140        | 0.683–1.904           |
| Mother's father**                  | 0.5642  | 0.727        | 0.245–2.152           |
| Father's brother**                 | 0.4564  | 1.294        | 0.657–2.549           |
| Father's father's brother**        | 0.0274  | 2.107        | 1.087–4.086           |
| Unrelated**                        | 0.5884  | 0.554        | 0.065–4.699           |
| Miscellaneous**                    | 0.6710  | 0.832        | 0.357–1.941           |
| Grandparents                       |         |              |                       |
| Father's mother*                   | 0.1026  | —            | —                     |
| Father's father*                   | 0.1316  | 1.443        | 0.869–2.324           |
| Mother's mother*                   | 0.9408  | 0.987        | 0.691–1.409           |
| Mother's father*                   | 0.5745  | 1.100        | 0.788–1.537           |

The significant interaction of father's age and survival status of father's mother shows that older paternal grandmothers are more harmful than younger paternal grandmothers. Mother's age was omitted because it is collinear with father's age.

\*Reference is dead.

<sup>†</sup>Reference is year 3.

<sup>‡</sup>Reference is female.

<sup>§</sup>This variable shows the effect of polygyny in villages 1–8 in terms of the ratio of married women to married men in the WEG.

<sup>||</sup>Reference is villages 1–8.

<sup>||</sup>This variable shows the interaction of polygyny and village.

\*\*Reference is father.
